# Supplementary material
Source: publisher site journal article supplement (https://www.dovepress.com/article/294183)
Supplement: Supplementary file 1 [file get_supplementary_file.php]

**Supplementary material**

**Measuring Change in CPAP/BiPAP Adherence Code # ________**

Directions: This survey is voluntary, which means you may choose not to complete it or not to answer individual questions. There is no direct benefit of this survey to you but your responses will help in developing effective Continuous Positive Airway Pressure (CPAP)/ Bi-level Positive Airway Pressure (BiPAP) adherence education programs. All data from this survey will be kept confidential. Please put an X mark by the response or fill the response that correctly describes your position. Thank you for your help!

1. Have you recently been diagnosed with sleep apnea by a health care provider? Yes

No

***If your response is No, please STOP taking this questionnaire. Thank you for your time.***

………………………………………………………………………………………………………

1. Have you recently been prescribed use of CPAP/BiPAP machine? Yes

No

***If your response is Yes, then complete the full questionnaire. If it is no, please STOP taking this questionnaire. Thank you for your time.***

………………………………………………………………………………………………………

1. What is your gender? Male

Female

Other, ________________

………………………………………………………………………………………………………

1. How old are you today? _______ years

………………………………………………………………………………………………………

1. What is your race/ethnicity? White or Caucasian American

Black or African American

Asian American

American Indian

Hispanic American

Other _________________

………………………………………………………………………………………………………

1. What is your highest level of Some schooling but not completed high school

education? Completed high school or GED

Some college

Completed college/ Graduate degree

Post graduate degree

Professional degree

………………………………………………………………………………………………………

7. Do you work for pay? No

Yes, _____ average hours/week (put a single number not a range)

………………………………………………………………………………………………………

8. What is your occupation? __________________________

………………………………………………………………………………………………………

9. What is your yearly household income? Less than $ 50,000

$ 50,001 to $ 100,000

$100,001 to $150,000

$150,001 to $200,000

More than $200,000

Prefer not to answer

………………………………………………………………………………………………………

**Not At Slightly Moderately Very Completely**

**All Much**

***About your sleep study experience***

10. To what extent were you comfortable

with your mask in your sleep study?

………………………………………………………………………………………………………

11. To what extent were you comfortable

with the pressure of CPAP?BiPPAP

in your sleep study?

………………………………………………………………………………………………………

12. Do you think you slept better with

your CPAP/BiPAP in your sleep study?

………………………………………………………………………………………………………

**Never Almost Sometimes Fairly Very**

**Never Often Often**

***Participatory dialogue: Advantages***

**If you start using CPAP/BiPAP machine**

**every night you may…**

13 … sleep well.

………………………………………………………………………………………………………

14 … not have drowsiness in the day.

………………………………………………………………………………………………………

15. … have less chance of getting heart

disease.

………………………………………………………………………………………………………

16. …have less chance of getting into motor

vehicle accidents due to drowsiness.

………………………………………………………………………………………………………

17. … no longer have snoring.

………………………………………………………………………………………………………

**Never Almost Sometimes Fairly Very**

**Never Often Often**

***Participatory Dialogue: Disadvantages***

**If you start using CPAP/BiPAP machine**

**every night you may…**

18. … be inconvenienced.

………………………………………………………………………………………………………

19. … not be able to afford the associated

financial costs.

………………………………………………………………………………………………………

20. … experience claustrophobia of the mask.

………………………………………………………………………………………………………

21. … have nasal congestion.

………………………………………………………………………………………………………

22. …have runny nose.

………………………………………………………………………………………………………

**Not At Slightly Moderately Very Completely**

**All Sure Sure Sure Sure Sure**

***Behavioral confidence***

**How sure are you that you will start using**

**CPAP/BiPAP machine every night …**

23. … this week?

………………………………………………………………………………………………………

24. … this week despite inconvenience?

………………………………………………………………………………………………………

25. … this week despite nasal problems?

………………………………………………………………………………………………………

26. … this week with the requirements of

cleaning the equipment?

………………………………………………………………………………………………………

27. … this week even if you have to travel?

………………………………………………………………………………………………………

**Not At Slightly Moderately Very Completely**

**All Sure Sure Sure Sure Sure**

***Changes in physical environment***

**How sure are you that you will…**

28. … have access to CPAP/BiPAP machine

every night?

………………………………………………………………………………………………………

29. … have access to associated mask?

………………………………………………………………………………………………………

30. … be able to use it while traveling?

………………………………………………………………………………………………………

**Not At Slightly Moderately Very Completely**

**All Sure Sure Sure Sure Sure**

***Emotional transformation***

**How sure are you that you can…**

31. … guide your emotions/feelings to the goal

of using CPAP/BiPAP machine every night?

………………………………………………………………………………………………………

32. … motivate yourself to using CPAP/ BiPAP

machine every night?

………………………………………………………………………………………………………

33. … overcome self-doubt in accomplishing

the goal of using CPAP/BiPAP machine

every night?

………………………………………………………………………………………………………

***Practice for change***

**How sure are you that you can…**

34. … keep a self-diary/log/app to monitor

using CPAP/BiPAP machine every night?

………………………………………………………………………………………………………

35. … be able to use CPAP/BiPAP machine

every night even if you encounter barriers?

………………………………………………………………………………………………………

36. … adjust your plans for using CPAP/BiPAP

machine every night if you face

difficulties?

………………………………………………………………………………………………………

**Not At Slightly Moderately Very Completely**

**All Sure Sure Sure Sure Sure**

***Changes in social environment***

**How sure are you that you can get the help of a…**

37. …family member to support you with

using CPAP/BiPAP machine every night?

………………………………………………………………………………………………………

38. …friend to support you with using

CPAP/BiPAP machine every night?

………………………………………………………………………………………………………

39. …health professional to support you with

using CPAP/BiPAP machine every night?

………………………………………………………………………………………………………

**Not At Somewhat Moderately Very Completely**

**All Likely Likely Likely Likely Likely**

***Behavior change: Initiation***

**How likely is it that you will…**

40. … use CPAP/BiPAP machine every night

in the upcoming week?

………………………………………………………………………………………………………

**Not At Somewhat Moderately Very Completely**

**All Likely Likely Likely Likely Likely**

***Behavior change: Sustenance***

**How likely is it that you will continue to…**

41. … use CPAP/BiPAP machine every night

from now on?

………………………………………………………………………………………………………

*Thank you for your time!*

**SCORING**

**Sleep study experience:** Scale: Not at all (0), slightly (1), moderately (2), very (3), completely (4). Summative score of Items 10-12. Possible range 0-12. Score to be used as a covariate.

**Construct of advantages:** Scale: Never (0), Almost never (1), Sometimes (2), Fairly often (3), Very often (4). Summative score of Items 13-17. Possible range: 0- 20. High score associated with likelihood of initiation of behavior change.

**Construct of disadvantages:** Scale: Never (0), Almost never (1), Sometimes (2), Fairly often (3), Very often (4). Summative score of Items 18-22. Possible range: 0- 20. Low score associated with likelihood of initiation of behavior change.

Subtract disadvantages score from advantages score to calculate **participatory dialogue** construct score. Positive score will be indicative of behavior change. Possible range: -20 - +20

**Construct of behavioral confidence:** Scale: Not at all sure (0), slightly sure (1), moderately sure (2), very sure (3), completely sure (4). Summative score of Items 23-27. Possible range 0-20. High score associated with likelihood of initiation of behavior change.

**Construct of changes in physical environment:** Scale: Not at all sure (0), slightly sure (1), moderately sure (2), very sure (3), completely sure (4). Summative score of Items 28-30. Possible range 0-12. High score associated with likelihood of initiation of behavior change.

**Construct of emotional transformation:** Scale: Not at all sure (0), slightly sure (1), moderately sure (2), very sure (3), completely sure (4). Summative score of Items 31-33. Possible range 0-12. High score associated with likelihood of sustenance of behavior change.

**Construct of practice for change:** Scale: Not at all sure (0), slightly sure (1), moderately sure (2), very sure (3), completely sure (4). Summative score of Items 34-36. Possible range 0-12. High score associated with likelihood of sustenance of behavior change.

**Construct of changes in social environment:** Scale: Not at all sure (0), slightly sure (1), moderately sure (2), very sure (3), completely sure (4). Summative score of Items 37-39. Possible range 0-12. High score associated with likelihood of sustenance of behavior change.

For **modeling** **initiation** dependent variable can be Item 40: not at all likely (0), somewhat likely (1), moderately likely (2), very likely (3), and completely likely (4) and multiple regression can be used. For **modeling sustenance** dependent variable can be Item 41: not at all likely (0), somewhat likely (1), moderately likely (2), very likely (3), and completely likely (4) and multiple regression can be used.

**Flesch Reading Ease: 72.1**

**Flesch-Kincaid Grade Level: 4.3**

©Manoj Sharma
